# Supplementary material
Source: PubMed Central journal article supplement (PMC1736053)
Supplement: jmedgene_42_5_408_v3_1.pdf [file jmedgene_42_5_408_v3_1.pdf]

**Online Supplemental Table 1**

21qter critical region microsatellite markers\* and SNPs\* for the CFEOM/U family members

| Marker Name | Position on Chromosome 21 (bp) | I-3     | II-8    | II-9           | II-10          | II-12   | II-13   | II-14          | III-4   | III-5   | III-10         | III-11         | III-14  | IV-1           |
|-------------|--------------------------------|---------|---------|----------------|----------------|---------|---------|----------------|---------|---------|----------------|----------------|---------|----------------|
| D21S1260    | 41 616 421                     |         | 208 210 | <b>210 218</b> | <b>204 210</b> | 204 210 | 204 218 | <b>204 210</b> | 204 208 | 204 208 | <b>208 218</b> | <b>208 210</b> | 204 206 | <b>208 208</b> |
| rs234781    | 43 324 461                     |         |         | <b>C C</b>     | <b>C C</b>     |         |         | <b>C C</b>     |         |         | <b>C T</b>     | <b>C T</b>     |         |                |
| rs2839627   | 43 342 854                     |         |         | <b>C T</b>     | <b>C C</b>     |         |         | <b>C C</b>     |         |         | <b>T C</b>     | <b>C C</b>     |         |                |
| rs170916    | 43 342 899                     |         |         | <b>C G</b>     | <b>C C</b>     |         |         | <b>C C</b>     |         |         | <b>G G</b>     | <b>C G</b>     |         |                |
| rs234728    | 43 342 911                     |         |         | <b>A G</b>     | <b>A A</b>     |         |         | <b>A A</b>     |         |         | <b>G G</b>     | <b>A G</b>     |         |                |
| D21S1890    | 43 704 380                     | 162 164 | 149 162 | <b>162 162</b> | <b>162 162</b> | 162 164 | 162 164 | <b>162 162</b> | 149 162 | 149 156 | <b>149 162</b> | <b>149 162</b> | 149 162 | <b>149 149</b> |
| D21S1259    | 44 180 066                     | 204 218 | 216 218 | <b>204 204</b> | <b>204 204</b> | 204 218 | 218 218 | <b>204 204</b> | 218 218 | 218 218 | <b>204 218</b> | <b>204 218</b> | 204 216 | <b>218 218</b> |
| D21S1912    | 44 433 938                     | 169 197 | 169 191 | <b>169 169</b> | <b>169 169</b> | 169 197 | 197 199 | <b>169 169</b> | 191 194 | 191 197 | <b>169 191</b> | <b>169 191</b> | 169 199 | <b>191 191</b> |
| 1305K*<br>* | 44 748 500                     | 243 253 | 245 245 | <b>243 243</b> | <b>243 243</b> | 243 253 | 247 253 | <b>243 243</b> | 245 247 | 245 249 | <b>243 245</b> | <b>243 245</b> | 243 247 | <b>245 245</b> |
| D21S171     | 44 848 869                     | 113 123 | 115 115 | <b>113 113</b> | <b>113 113</b> | 113 123 | 117 123 | <b>113 113</b> | 115 117 | 115 119 | <b>113 115</b> | <b>113 115</b> | 113 117 | <b>115 115</b> |
| D21S1903    | 44 997 254                     | 239 255 | 245 253 | <b>255 255</b> | <b>255 255</b> | 239 255 | 239 243 | <b>255 255</b> | 248 253 | 245 253 | <b>253 255</b> | <b>253 255</b> | 249 255 | <b>253 253</b> |

| Marker Name | Position on Chromosome 21 (bp) |     |         |                |                |         |         |                |         |         |                |                |        |            |  |  |  |  |
|-------------|--------------------------------|-----|---------|----------------|----------------|---------|---------|----------------|---------|---------|----------------|----------------|--------|------------|--|--|--|--|
|             |                                | I-3 | II-8    | II-9           | II-10          | II-12   | II-13   | II-14          | III-4   | III-5   | III-10         | III-11         | III-14 | IV-1       |  |  |  |  |
| D21S18      | 45 400                         | 200 |         |                |                |         |         |                |         |         |                |                |        |            |  |  |  |  |
| 97          | 825                            | 202 | 196 200 | <b>202 202</b> | <b>202 202</b> | 200 202 | 200 202 | <b>202 202</b> | 196 196 | 196 200 | <b>196 202</b> | <b>196 202</b> | 202    | <b>196</b> |  |  |  |  |
| rs19993     | 45 526                         | C C |         | C C            |                |         |         |                |         |         | C G            | C G            |        |            |  |  |  |  |
| 33          | 603                            |     |         |                |                |         |         |                |         |         |                |                |        |            |  |  |  |  |
| rs19993     | 45 526                         | A A |         | A A            |                |         |         |                |         |         | A G            | A G            |        |            |  |  |  |  |
| 34          | 659                            |     |         |                |                |         |         |                |         |         |                |                |        |            |  |  |  |  |
| 2044K*      | 45 585                         | 248 | 250 254 | <b>248 248</b> | <b>248 248</b> | 248 248 | 244 248 | <b>248 248</b> | 244 250 | 250 254 | <b>248 250</b> | <b>248 250</b> | 244    | <b>250</b> |  |  |  |  |
| *           | 432                            | 248 |         |                |                |         |         |                |         |         |                |                | 248    | <b>250</b> |  |  |  |  |
| rs28389     | 45 696                         | C C |         | C C            |                |         |         |                |         |         | C C            | C C            |        |            |  |  |  |  |
| 17          | 106                            |     |         |                |                |         |         |                |         |         |                |                |        |            |  |  |  |  |
| rs72535     | 46 004                         | T T |         | T T            |                |         |         |                |         |         | T T            | T T            |        |            |  |  |  |  |
| 8           | 439                            |     |         |                |                |         |         |                |         |         |                |                |        |            |  |  |  |  |
| 2849K*      | 46 292                         | 228 | 226 228 | <b>228 228</b> | <b>228 228</b> | 228 228 | 228 228 | <b>228 228</b> | 226 228 | 226 228 | <b>228 228</b> | <b>228 228</b> | 228    | <b>228</b> |  |  |  |  |
| *           | 500                            | 228 |         |                |                |         |         |                |         |         |                |                | 230    | <b>228</b> |  |  |  |  |
| rs28391     | 46 517                         | T T |         | T T            |                |         |         |                |         |         | T T            | T T            |        |            |  |  |  |  |
| 68          | 817                            |     |         |                |                |         |         |                |         |         |                |                |        |            |  |  |  |  |
| rs10606     | 46 518                         | G G |         | G G            |                |         |         |                |         |         | G G            | G G            |        |            |  |  |  |  |
| 09          | 648                            |     |         |                |                |         |         |                |         |         |                |                |        |            |  |  |  |  |
| 3086K*      | 46 529                         | 251 | 251 259 | <b>251 251</b> | <b>251 251</b> | 251 251 | 251 251 | <b>251 251</b> | 251 251 | 251 259 | <b>251 251</b> | <b>251 251</b> | 251    | <b>251</b> |  |  |  |  |
| *           | 500                            | 251 |         |                |                |         |         |                |         |         |                |                | 253    | <b>251</b> |  |  |  |  |
| rs28392     | 46 656                         | T T |         | T T            |                |         |         |                |         |         | T T            | T T            |        |            |  |  |  |  |
| 35          | 794                            |     |         |                |                |         |         |                |         |         |                |                |        |            |  |  |  |  |
| 3258K*      | 46 701                         | 215 | 215 218 | <b>215 215</b> | <b>215 215</b> | 215 215 | 215 215 | <b>215 215</b> | 215 224 | 215 218 | <b>215 215</b> | <b>215 215</b> | 215    | <b>215</b> |  |  |  |  |
| *           | 500                            | 215 |         |                |                |         |         |                |         |         |                |                | 221    | <b>215</b> |  |  |  |  |
| rs28392     | 46 754                         | C C |         | C C            |                |         |         |                |         |         | C C            | C C            |        |            |  |  |  |  |

| Marker Name    | Position on Chromosome 21 (bp) | Chromosomes |         |                |                |         |         |                |         |         |                |            |        |            |  |
|----------------|--------------------------------|-------------|---------|----------------|----------------|---------|---------|----------------|---------|---------|----------------|------------|--------|------------|--|
|                |                                | I-3         | II-8    | II-9           | II-10          | II-12   | II-13   | II-14          | III-4   | III-5   | III-10         | III-11     | III-14 | IV-1       |  |
| <b>81</b>      | 169                            |             |         |                |                |         |         |                |         |         |                |            |        |            |  |
| <b>D21S14</b>  | 46 793                         | 213         | 213 224 | <b>213 213</b> | <b>213 213</b> | 213 213 | 213 213 | <b>213 213</b> | 213 224 | 213 224 | <b>213 213</b> | <b>213</b> | 213    | <b>213</b> |  |
| <b>46</b>      | 784                            | 213         |         |                |                |         |         |                |         |         |                | <b>213</b> | 224    | <b>213</b> |  |
| <b>rs9722</b>  | 46 875<br>441                  | C C         |         | C C            |                |         |         |                |         |         |                | C C        | C C    |            |  |
| <b>rs88182</b> | 46 876<br>070                  | C T         | C C     | C C            | C C            | C T     | C T     | C C            | C C     | C C     | C C            | C C        | C C    | C C        |  |

\*Markers sizes in bp or SNP base.

\*\*Newly designed markers. For primer sequence information, see online Supplemental Table 2.

Affected individuals are shown in bold. The critical region homozygous in all affected individuals is framed in bold.

### Online Supplemental Table 2

Primer information of the newly designed microsatellite markers

A

| Marker | Primer Sequence            |                            | Observed Allele Sizes (bp) |
|--------|----------------------------|----------------------------|----------------------------|
|        | Forward                    | Reverse                    |                            |
| 1305K  | 5'-ACCGCTGGTACATGTGAATG-3' | 5'-TGCTATCTTTGGGGTCCTTG-3' | 243–253                    |
| 2044K  | 5'-CATCAACACCCACACCAGAG-3' | 5'-GTGTGCACAGTGCTCTCCAG-3' | 248–254                    |
| 2849K  | 5'-GGACCGATGGACAGAAGGTA-3' | 5'-TGCAGCCATGAATTAGATGC-3' | 226–230                    |
| 3086K  | 5'-CACATGTTGGTGGTGGACA-3'  | 5'-CCGCCACTGACTCTCTCTCT-3' | 251–259                    |
| 3858K  | 5'-TTACCCTGTGCATTTCTGGA-3' | 5'-GCAGTGAGCTGAGATTGTGC-3' | 215–221                    |
